# Supplementary material
Source: Springer Nature journal article supplement (https://www.springermedizin.de/resource/supplementary/12950_2011_233_MOESM4_ESM.pdf/9558262)

# C1-Inhibitor

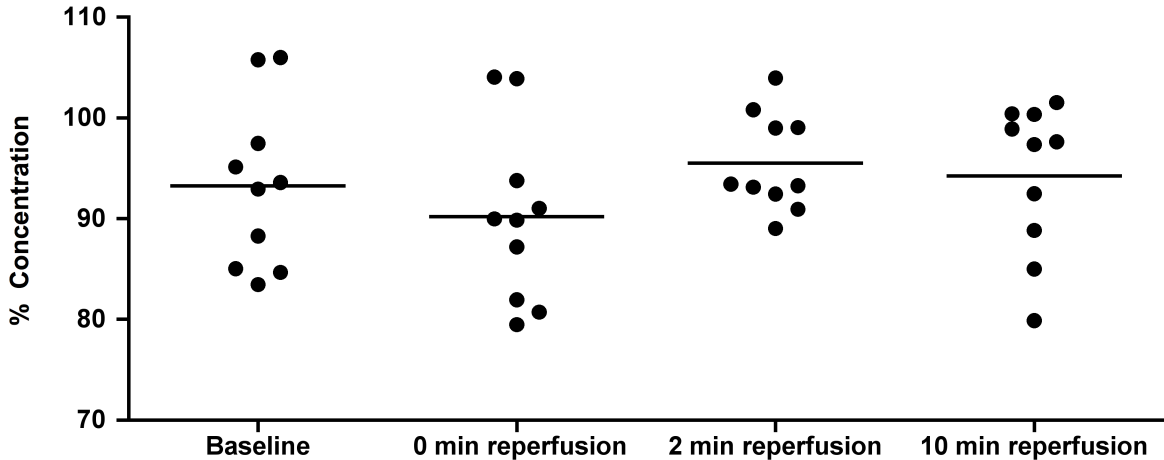

Supplement: MOESM4 [file 9558262]
